# Supplementary material for: A Novel Indentation Assessment to Measure Corneal Biomechanical Properties in Glaucoma and Ocular Hypertension
Source: PubMed Central journal article supplement — Transl Vis Sci Technol. 2021 Aug 30;10(9):36. doi: 10.1167/tvst.10.9.36 (PMC8411863; doi:10.1167/tvst.10.9.36), 2021-08-30
Supplement: tvst-10-9-36_s001.pdf [file tvst-10-9-36_s001.pdf]

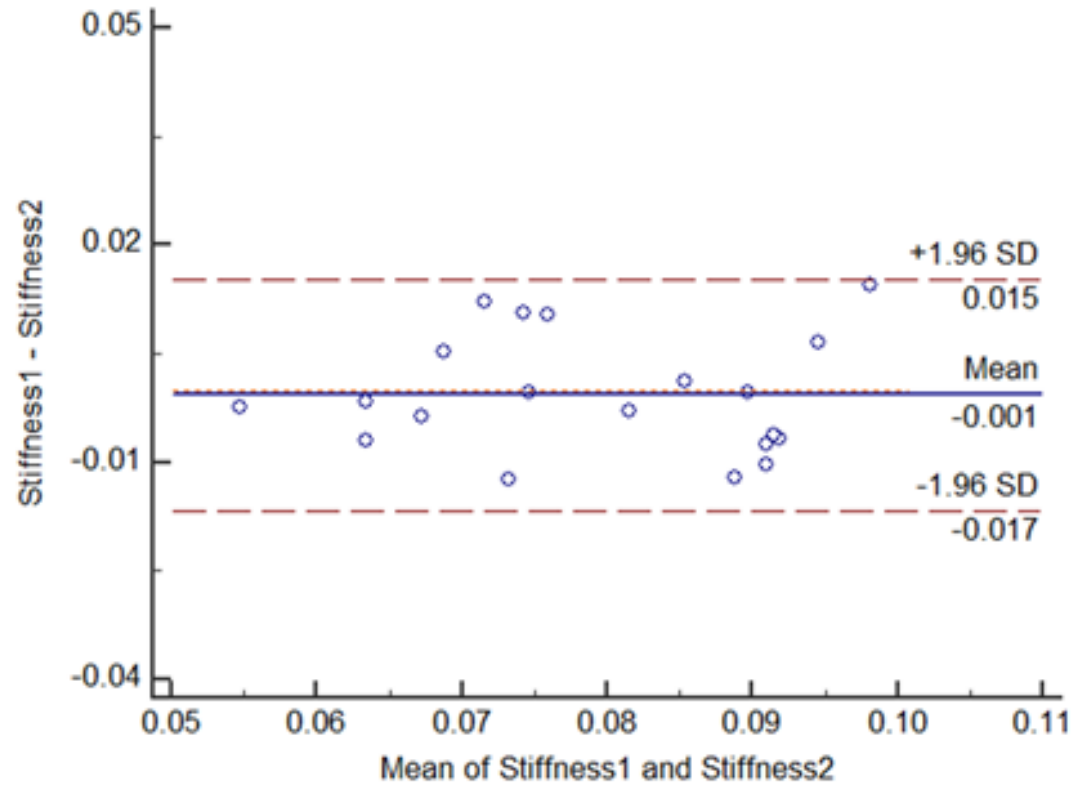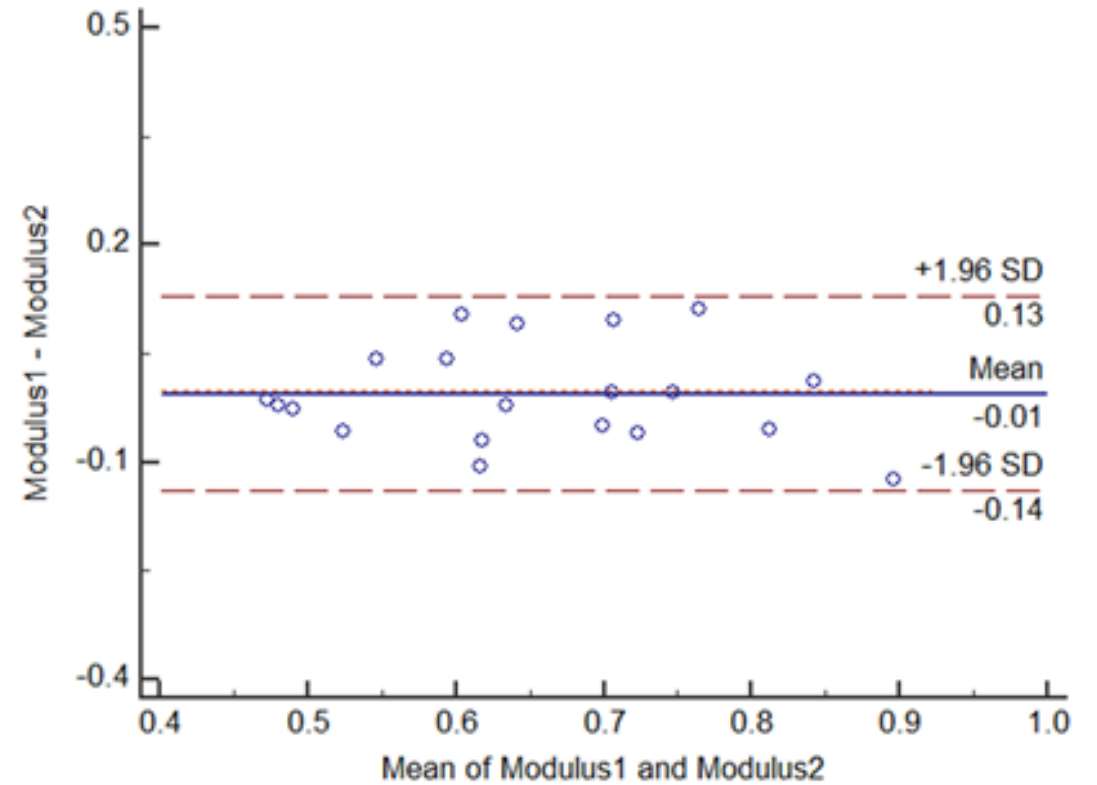

Figure S1. Bland-Altman plots of CID parameters showing the agreement between two tests in the same subject. The area between the dotted lines indicates the 95% limits of agreement on the test-retest difference. The blue solid line indicates the mean difference between test-retest CID measurements.
