# Supplementary material for: A Novel Indentation Assessment to Measure Corneal Biomechanical Properties in Glaucoma and Ocular Hypertension
Source: PubMed Central journal article supplement — Transl Vis Sci Technol. 2021 Aug 30;10(9):36. doi: 10.1167/tvst.10.9.36 (PMC8411863; doi:10.1167/tvst.10.9.36), 2021-08-30
Supplement: tvst-10-9-36_s002.pdf [file tvst-10-9-36_s002.pdf]

## Supplementary Materials

### Test-retest reliability of CID

Twenty right eyes of 20 healthy subjects (10 men and 10 women) were analyzed in the cross-sectional study. The mean age was  $29.4 \pm 2.6$  (range: 20-56) years old. The inclusion and exclusion criteria were same as criteria in the manuscript method. To assess the intra-operator repeatability, the Corneal Indentation Device (CID) measurements were repeated two times by the observer. Paired *t*-test was used to compare the difference between two CID tests. Intraclass correlation (ICC) and Bland-Altman analysis were carried out to evaluate the test-retest reliability of CID measurement.

The comparison and reliability indices (ICC and Cronbach's  $\alpha$ ) of CID parameters are shown in Table S1. The paired *t*-test analysis revealed no significant intra-operator differences for both CID parameters ( $p > 0.05$ ). The stiffness (ICC 0.812; Cronbach's  $\alpha$  0.892) and modulus (ICC 0.858; Cronbach's  $\alpha$  0.921) of two measurements showed excellent repeatability (ICC  $\geq 0.75$ ; Cronbach's  $\alpha > 0.7$ ). According to the Bland-Altman plot (Figure S1), the narrow limits of agreement (LoA) of stiffness (-0.005 to 0.003) and modulus (-0.038 to 0.026) were observed. It showed that 100% were included in 95% limits of agreement.

In conclusion, both the stiffness and modulus showed favorable measurement reliability in healthy subjects.

Table S1. The comparison and reliability indices of CID parameters in two measurements

|                  | Test 1            | Test 2            | Paired <i>t</i> -test<br><i>P</i> value | ICC    | Cronbach's<br>$\alpha$ |
|------------------|-------------------|-------------------|-----------------------------------------|--------|------------------------|
| Stiffness (N/mm) | $0.079 \pm 0.013$ | $0.080 \pm 0.013$ | 0.710                                   | 0.812* | 0.892                  |
| Modulus (MPa)    | $0.653 \pm 0.123$ | $0.659 \pm 0.129$ | 0.705                                   | 0.858* | 0.921                  |

\* Correlation is significant at the 0.05 level.
